# Supplementary material
Source: publisher figshare collection journal article supplement (https://sage.figshare.com/ndownloader/files/12981473)
Supplement: Supplementary file 1 [file 12981473]

## Sheet: Supp. Table 4
Supplementary Table 4: Sub Grouping of Cell Migration Related Ontologies
Blood Vessels
cell migration involved in coronary angiogenesis (GO:0060981)
cell migration involved in sprouting angiogenesis (GO:0002042)
negative regulation of blood vessel endothelial cell migration (GO:0043537)
negative regulation of cell migration involved in sprouting angiogenesis (GO:0090051)
positive regulation of vascular associated smooth muscle cell migration (GO:1904754)
Immune Response
eosinophil migration (GO:0072677)
leukocyte migration involved in immune response (GO:0002522)
leukocyte migration involved in inflammatory response (GO:0002523)
lymphocyte migration into lymphoid organs (GO:0097021)
monocyte chemotaxis (GO:0002548)
neutrophil extravasation (GO:0072672)
neutrophil migration (GO:1990266)
positive regulation of natural killer cell chemotaxis (GO:2000503)
positive regulation of T cell migration (GO:2000406)
regulation of lymphocyte chemotaxis (GO:1901623)
regulation of macrophage chemotaxis (GO:0010758)
regulation of neutrophil chemotaxis (GO:0090022)
positive regulation of neutrophil chemotaxis (GO:0090023)
negative regulation of neutrophil chemotaxis (GO:0090024)
positive regulation of leukocyte chemotaxis (GO:0002690)
Chemotaxis
positive regulation of natural killer cell chemotaxis (GO:2000503)
regulation of lymphocyte chemotaxis (GO:1901623)
regulation of macrophage chemotaxis (GO:0010758)
regulation of neutrophil chemotaxis (GO:0090022)
cell chemotaxis (GO:0060326)
chemokine activity (GO:0008009)
substrate-dependent cell migration, cell extension (GO:0006930)
positive regulation of neutrophil chemotaxis (GO:0090023)
negative regulation of neutrophil chemotaxis (GO:0090024)
positive regulation of leukocyte chemotaxis (GO:0002690)
Endothelial Cells
endothelial cell migration (GO:0043542)
negative regulation of endothelial cell migration (GO:0010596)
positive regulation of endothelial cell migration (GO:0010595)
negative regulation of blood vessel endothelial cell migration (GO:0043537)
Smooth Muscle Cells
positive regulation of vascular associated smooth muscle cell migration (GO:1904754)
positive regulation of smooth muscle cell migration (GO:0014911)
Fibroblasts
negative regulation of fibroblast migration (GO:0010764)
positive regulation of fibroblast migration (GO:0010763)
Epithelial Cells
negative regulation of epithelial cell migration (GO:0010633)
positive regulation of epithelial cell migration (GO:0010634)
Adherens Junctions
cadherin binding (GO:0045296)
Unspecified Cell Migration
cell migration (GO:0016477)
positive regulation of cell migration (GO:0030335)
negative regulation of cell migration (GO:0030336)
Neural Associated Migration
neural crest cell migration (GO:0001755)
neuron migration (GO:0001764)
radial glia guided migration of cerebellar granule cell (GO:0021933)
regulation of Schwann cell migration (GO:1900147)
ventral trunk neural crest cell migration (GO:0036486)
Migration Associated Cell Components
cytoplasm (GO:0005737)
endoplasmic reticulum (GO:0005783)
